# Supplementary material for: High-Fat Diet-Induced Obesity Causes Sex-Specific Deficits in Adult Hippocampal Neurogenesis in Mice
Source: eNeuro. 2020 Jan 2;7(1):ENEURO.0391-19.2019. doi: 10.1523/ENEURO.0391-19.2019 (PMC6946541; doi:10.1523/ENEURO.0391-19.2019)
Supplement: Figure 6-1 — Estimation statistics were performed for microglia-related measures, with data in the table representing the percentage differences between groups and 95% CI values. Values that are bolded/italicized/underlined and highlighted in gray were also found to be statistically significant via hypothesis testing (two-way ANOVA with Tukey’s post hoc test; α = 0.05). M CON, Male CON diet; M HF, male HF diet; F CON, females CON diet; F HF, female HF diet. Download Figure 6-1, XLSX file. [file sup_enu-eN-NWR-0391-19-s03.xlsx]

## Sheet: Sheet1
Figure 6-1
	F CON vs. M CON			F HF vs. M HF			M HF vs. M CON			F HF vs. F CON
	Difference	95% CI (-)	95% CI (+)	Difference	95% CI (-)	95% CI (+)	Difference	95% CI (-)	95% CI (+)	Difference	95% CI (-)	95% CI (+)
Inner Iba1 (Whole)	-1.42545	-69.3243	66.5019	-69.8314	-99.9416	-39.6995	119.505	51.5822	187.428	-32.8224	-99.865	34.2587
Inner Iba1 (Dorsal)	-8.02734	-78.8751	62.8308	-63.1371	-94.4702	-31.804	119.996	49.1532	190.838	-11.823	-86.8145	63.1235
Inner Iba1 (Ventral)	7.58509	-69.5423	84.6929	-70.3427	-105.966	-34.7196	116.496	37.3826	195.608	-40.32	-110.096	29.4377
Outer Iba1 (Whole)	-16.4302	-85.885	53.0878	-73.1208	-110.096	-36.1452	107.566	38.0709	177.067	-33.2646	-125.086	58.5567
Outer Iba1 (Dorsal)	-29.5994	-101.5	42.2898	-64.779	-107.499	-22.0869	109.478	39.4046	179.545	-14.8045	-118.104	88.5215
Outer Iba1 (Ventral)	-27.4934	-92.4487	37.3975	-72.1916	-110.083	-34.3306	76.092	9.40565	142.784	-32.4584	-121.996	57.0721
Inner CD68 (Whole)	20.1961	-2.80112	43.0812	-39.0277	-57.7609	-20.2944	25.6022	2.71709	48.4874	-36.3552	-55.931	-16.7793
Inner CD68 (Dorsal)	27.4131	-2.673	57.4399	-18.5577	-42.5182	5.09749	26.433	-3.564	56.4598	-19.3473	-42.8904	4.28904
Inner CD68 (Ventral)	42.6024	0.396301	84.8415	-33.2895	-61.3228	-5.25624	50.7926	7.46367	94.1215	-29.4118	-58.3604	-0.694766
Outer CD68 (Whole)	15.6054	-29.5964	61.1659	-36.2757	-65.9008	-6.04595	48.4305	2.86996	93.9013	-17.8433	-56.633	20.3258
Outer CD68 (Dorsal)	10.2833	-54.5645	75.0262	-5.31108	-52.352	41.1229	38.3001	-24.1343	101.259	18.2683	-41.8649	78.4967
Outer CD68 (Ventral)	4.95868	-50.6198	60.0207	-21.4889	-63.6992	20.3377	34.6074	-21.6942	91.4256	0.197044	-52.2167	52.8079
Inner % Iba1 area CD68+ (Whole)	12.8935	-6.03165	31.8235	9.30195	-11.9528	30.5594	-10.9516	-29.8744	7.9807	-13.7865	-30.5481	2.98567
Inner % Iba1 area CD68+ (Dorsal)	14.2208	-10.2932	38.7403	2.21638	-23.7596	28.1923	-5.60685	-30.1264	18.9155	-15.5327	-37	5.94197
Inner % Iba1 area CD68+ (Ventral)	30.1683	4.8367	55.4998	15.9147	-12.2025	44.0342	-7.43949	-33.4673	18.5801	-17.5757	-37.0459	1.88015
Outer % Iba1 area CD68+ (Whole)	-6.62312	-38.8252	25.5561	6.44125	-36.2358	49.1486	-24.6197	-56.8218	7.56863	-14.0404	-48.5299	20.41
Outer % Iba1 area CD68+ (Dorsal)	15.3979	-35.8407	66.6215	37.2832	-12.2608	86.7823	0.715308	-49.168	50.576	19.8173	-24.6003	64.2088
Outer % Iba1 area CD68+ (Ventral)	-19.5294	-57.8569	18.7895	4.04126	-44.3269	52.3935	-18.6691	-56.9966	19.6498	5.15398	-43.734	54.0312
Inner Colocalized Iba1+/CD68+ (% area) (Whole)	-7.50939	-52.5657	38.9237	-63.4267	-94.7282	-32.9489	51.8148	5.88235	97.7472	-40.3769	-91.5209	9.95962
Inner Colocalized Iba1+/CD68+ (% area) (Dorsal)	32.5	-35.1852	99.8148	-66.6667	-108.123	-24.6499	65.2778	-3.7037	134.444	-58.0014	-109.015	-7.68693
Inner Colocalized Iba1+/CD68+ (% area) (Ventral)	2.83114	-41.456	47.4216	-68.0359	-97.561	-39.1528	57.4317	12.8413	102.123	-51.1308	-96.3618	-6.88299
Outer Colocalized Iba1+/CD68+ (% area) (Whole)	-33.0033	-92.4092	30.033	-66.0793	-107.93	-24.2291	49.835	-9.90099	110.231	-24.2718	-121.359	67.4757
Outer Colocalized Iba1+/CD68+ (% area) (Dorsal)	-13.624	-73.5695	48.2289	-60.1852	-118.056	-4.62963	17.7112	-46.3215	82.2888	-46.729	-118.38	23.676
Outer Colocalized Iba1+/CD68+ (% area) (Ventral)	-5.8651	-79.1789	66.8622	-70.6076	-111.658	-29.5567	78.5924	5.57185	151.613	-43.75	-121.875	33.4375
